# Supplementary material for: Costing Analysis of a Pilot Community Health Worker Program in Rural Nepal
Source: PubMed Central journal article supplement (PMC7326517; doi:10.9745/ghsp-d-19-00393), 2020-06-30
Supplement: 19-00393-Schwarz-Supplement_2.pdf [file 19-00393-Schwarz-Supplement_2.pdf]

**Supplementary File 2.** Costing of Community Health Worker Pilot Program and Alternative Implementation Scenarios

| Description                                        | CHW Pilot (Actual) |                 |                  | Scenario 1      |                 |                  | Scenario 2      |                 |                  | Scenario 3      |                 |                 |
|----------------------------------------------------|--------------------|-----------------|------------------|-----------------|-----------------|------------------|-----------------|-----------------|------------------|-----------------|-----------------|-----------------|
|                                                    | Sanfebagar         | Kamalbazaar     | Total            | Sanfebagar      | Kamalbazaar     | Total            | Sanfebagar      | Kamalbazaar     | Total            | Sanfebagar      | Kamalbazaar     | Total           |
| Part A: Disaggregation of Total Costs              |                    |                 |                  |                 |                 |                  |                 |                 |                  |                 |                 |                 |
| Personnel Costs (A)                                | \$92,264           | \$43,796        | \$136,060        | \$61,589        | \$34,899        | \$96,488         | \$50,520        | \$29,225        | \$79,746         | \$34,758        | \$20,123        | \$54,881        |
| Compensation of CHWs                               | \$65,433           | \$29,020        | \$94,453         | \$34,758        | \$20,123        | \$54,881         | \$34,758        | \$20,123        | \$54,881         | \$34,758        | \$20,123        | \$54,881        |
| Compensation of CHNs                               | \$15,762           | \$9,102         | \$24,864         | \$15,762        | \$9,102         | \$24,865         | \$15,762        | \$9,102         | \$24,865         | -               | -               | -               |
| Compensation of CHPAs                              | \$11,069           | \$5,674         | \$16,743         | \$11,069        | \$5,674         | \$16,742         | -               | -               | -                | -               | -               | -               |
| Other Direct Expenses (B)                          | \$6,531            | \$6,656         | \$13,187         | \$6,530         | \$6,655         | \$13,186         | \$6,530         | \$6,655         | \$13,186         | \$1,765         | \$1,020         | \$2,785         |
| Medical consumables, lab reagents, etc.            | \$5,793            | \$5,918         | \$11,711         | \$5,793         | \$5,918         | \$11,710         | \$5,793         | \$5,918         | \$11,710         | \$1,765         | \$1,020         | \$2,785         |
| Depreciation of ultrasound equipment               | \$738              | \$738           | \$1,476          | \$738           | \$738           | \$1,475          | \$738           | \$738           | \$1,475          | -               | -               | -               |
| Indirect Expenses (C)                              | \$19,532           | \$15,726        | \$35,258         | \$19,533        | \$15,727        | \$35,259         | \$4,803         | \$4,228         | \$9,031          | \$4,070         | \$3,394         | \$7,464         |
| Staff benefits and uniform                         | \$2,693            | \$2,919         | \$5,612          | \$2,693         | \$2,919         | \$5,612          | \$602           | \$421           | \$1,024          | \$600           | \$421           | \$1,022         |
| Jeep rental expenses                               | \$11,699           | \$8,742         | \$20,441         | \$11,699        | \$8,742         | \$20,441         | -               | -               | -                | -               | -               | -               |
| Regular supplies and administrative                | \$2,198            | \$2,467         | \$4,665          | \$2,198         | \$2,467         | \$4,666          | \$2,198         | \$2,434         | \$4,632          | \$2,198         | \$2,052         | \$4,250         |
| Digital tools and network expenses                 | \$2,942            | \$1,598         | \$4,540          | \$2,942         | \$1,598         | \$4,540          | \$2,003         | \$1,372         | \$3,375          | \$1,272         | \$921           | \$2,192         |
| <b>TOTAL COSTS (A+B+C)</b>                         | <b>\$118,327</b>   | <b>\$66,178</b> | <b>\$184,505</b> | <b>\$87,652</b> | <b>\$57,281</b> | <b>\$144,933</b> | <b>\$61,854</b> | <b>\$40,108</b> | <b>\$101,962</b> | <b>\$40,593</b> | <b>\$24,537</b> | <b>\$65,130</b> |
| Part B: Disaggregation of Administrative Functions |                    |                 |                  |                 |                 |                  |                 |                 |                  |                 |                 |                 |
| Total cost of Administrative Functions             | \$49,651           | \$27,034        | \$76,685         | \$44,853        | \$25,182        | \$70,036         | \$23,546        | \$14,805        | \$38,350         | \$6,091         | \$4,905         | \$10,996        |
| Program planning, procurement & admin              | \$11,355           | \$6,137         | \$17,492         | \$10,397        | \$5,859         | \$16,257         | \$3,941         | \$2,391         | \$6,332          | \$1,212         | \$734           | \$1,946         |
| Continuous education & training                    | \$8,689            | \$4,575         | \$13,264         | \$6,693         | \$3,996         | \$10,690         | \$4,765         | \$2,907         | \$7,672          | \$2,526         | \$1,530         | \$4,055         |
| Supervision, monitoring, and evaluation            | \$21,837           | \$10,466        | \$32,303         | \$21,837        | \$10,466        | \$32,302         | \$10,258        | \$5,524         | \$15,782         | -               | -               | -               |

| Description                              | CHW Pilot (Actual) |             |         | Scenario 1 |             |         | Scenario 2 |             |         | Scenario 3 |             |         |
|------------------------------------------|--------------------|-------------|---------|------------|-------------|---------|------------|-------------|---------|------------|-------------|---------|
|                                          | Sanfebagar         | Kamalbazaar | Total   | Sanfebagar | Kamalbazaar | Total   | Sanfebagar | Kamalbazaar | Total   | Sanfebagar | Kamalbazaar | Total   |
| Data learning and reporting              | \$5,749            | \$3,123     | \$8,872 | \$4,792    | \$2,846     | \$7,637 | \$3,510    | \$2,132     | \$5,642 | \$1,212    | \$734       | \$1,946 |
| Continuous surveillance                  | \$2,021            | \$2,733     | \$4,754 | \$1,134    | \$2,016     | \$3,150 | \$1,072    | \$1,850     | \$2,922 | \$1,141    | \$1,907     | \$3,048 |
| Part C: Cost Per Capita by Programs      |                    |             |         |            |             |         |            |             |         |            |             |         |
| Total cost per capita                    | \$3.22             | \$2.80      | \$3.05  | \$2.38     | \$2.41      | \$2.40  | \$1.68     | \$1.69      | \$1.69  | \$1.10     | \$1.03      | \$1.08  |
| Pregnancy surveillance system            | \$0.76             | \$0.72      | \$0.75  | \$0.55     | \$0.61      | \$0.57  | \$0.39     | \$0.45      | \$0.41  | \$0.29     | \$0.35      | \$0.31  |
| Antenatal care                           | \$0.34             | \$0.62      | \$0.45  | \$0.24     | \$0.52      | \$0.35  | \$0.17     | \$0.38      | \$0.25  | \$0.12     | \$0.28      | \$0.19  |
| Group antenatal care                     | \$0.32             | \$0.59      | \$0.42  | \$0.29     | \$0.57      | \$0.40  | \$0.19     | \$0.33      | \$0.25  | -          | -           | -       |
| Postnatal care                           | \$0.26             | \$0.41      | \$0.32  | \$0.19     | \$0.34      | \$0.25  | \$0.14     | \$0.25      | \$0.18  | \$0.11     | \$0.19      | \$0.14  |
| Under 2 registry and malnutrition        | \$0.57             | \$0.45      | \$0.52  | \$0.41     | \$0.37      | \$0.40  | \$0.29     | \$0.28      | \$0.29  | \$0.22     | \$0.21      | \$0.22  |
| Chronic disease management               | \$0.99             | -           | \$0.59  | \$0.70     | -           | \$0.43  | \$0.50     | -           | \$0.30  | \$0.36     | -           | \$0.22  |
| Part D: Cost Per Beneficiary by Programs |                    |             |         |            |             |         |            |             |         |            |             |         |
| Pregnancy surveillance system            | \$6.58             | \$4.75      | \$5.74  | \$4.76     | \$3.99      | \$4.41  | \$3.39     | \$2.97      | \$3.20  | \$2.53     | \$2.29      | \$2.42  |
| Antenatal care                           | \$12.26            | \$13.47     | \$12.89 | \$8.85     | \$11.25     | \$10.10 | \$6.27     | \$8.27      | \$7.31  | \$4.64     | \$6.15      | \$5.42  |
| Group antenatal care                     | \$29.31            | \$25.43     | \$27.06 | \$26.67    | \$24.62     | \$25.48 | \$17.97    | \$14.13     | \$15.74 | -          | -           | -       |
| Postnatal care                           | \$5.40             | \$4.95      | \$5.16  | \$3.96     | \$4.13      | \$4.05  | \$2.88     | \$3.04      | \$2.96  | \$2.22     | \$2.31      | \$2.27  |
| Under 2 registry and malnutrition        | \$12.72            | \$10.59     | \$11.91 | \$9.21     | \$8.88      | \$9.09  | \$6.57     | \$6.58      | \$6.57  | \$4.91     | \$4.99      | \$4.94  |
| Chronic disease management               | \$20.18            | -           | \$20.18 | \$14.49    | -           | \$14.49 | \$10.19    | -           | \$10.19 | \$7.40     | -           | \$7.40  |

Abbreviations: CHN, community health nurse; CHPA, community health program associate, CHW, community health worker
